# Supplementary material for: Copayment and recommended strategies to mitigate its impacts on access to emergency medical services under universal health coverage: a case study from Thailand
Source: BMC Health Serv Res. 2016 Oct 21;16:606. doi: 10.1186/s12913-016-1847-y (PMC5073698; doi:10.1186/s12913-016-1847-y)
Supplement: Additional file 1: — Interview Question Guideline. (XLSX 23 kb) [file 12913_2016_1847_MOESM1_ESM.xlsx]

## Sheet: Sheet1
Supplementary file 5: Interview Question Guideline
Objectives	ประเด็นคำถาม	Questions	Key informants
		Clarity, Conformity, and Design	Regulators	The administrators of the health insurance schemes	Private hospital directors, financial staff and ED staffs	The clearing house administrators
clarifications of policy formulations, contents and system designs	นโยบายนี้เกิดขึ้นมาได้อย่างไร? (มีที่มาอย่างไร ใครเป็นคนเริ่ม) และปรับเปลี่ยนไปอย่างไรในระหว่างการพัฒนานโยบาย? (ใครเข้ามาเกี่ยวข้องบ้าง)	How was the policy formulated? (In terms of the rationale, the people who started it) How has it evolved during the time of policy development? (In terms of the people involved)	√	√		√
	นโยบายเรื่องบริการฉุกเฉินนี้มีเป้าประสงค์เชิงนโยบายที่เป็นรูปธรรมอะไร (อยากเห็นอะไร)	What are the concrete objectives for this policy? What exactly do you want to get out of this policy?	√	√		√
	ท่านคิดว่านโยบายนี้ตั้งขึ้นมาเพื่อวัตถุประสงค์ใด	For what objectives do you think this policy is created?		√		√
	นโยบายนี้มีวัตถุประสงค์ และแนวทางการดำเนินงานที่ชัดเจนหรือไม่อย่างไร	Are the objectives and procedural guidelines of this policy clear? How so?		√		√
	อะไรคือจุดแข็ง และจุดอ่อนของนโยบายนี้	What are the strengths and weaknesses of this policy?	√	√		√
	เบื้องหลังแนวคิดเรื่องดังกล่าวคืออะไร (การรวมการบริหารจัดการสามกองทุน? เรื่องนี้ถูกใช้มาเป็นเพียงรูปธรรมในการดำเนินการตามแนวคิดดังกล่าว? กลไกในระยะยาวเพื่อสานต่อควรมีลักษณะอย่างไร)	What is the motivation behind this policy? (The harmonization of the 3 public health insurance schemes? Are there any hidden agenda? What does the long-term mechanism look like?)	√	√		√
	คำนึงถึงข้อกฎหมายของแต่ละกองทุนสักเพียงใด เช่น ระบบสวัสดิการข้าราชการไม่มีระเบียบรองรับการโอนเงินให้กองทุนอื่น	Has the policy formulation taken account of specific legal aspects of each scheme? For instance, the absence of regulation to transfer CSMBS fund to the other schemes.	√	√		√
	คาดหวังผลลัพธ์ใน 6 เดือน ใน 1 ปีไว้อย่างไร	What are the expected results within the timescale of six months or 1 year?	√	√		√
	ได้ยินว่ามีการอ้างอิงอำนาจตามพรบ.สถานพยาบาล 2541 เพื่อขอความร่วมมือภาคเอกชน ในระยะยาวจะเพียงพอหรือไม่ เมื่อคำนึงถึงแรงจูงใจเพื่อแสวงหากำไรซึ่งแตกต่างกันมากระหว่างรพ.เอกชนต่างระดับกัน	Using the Sanatorium Act of B.E.2541( 1998) as legal framework to seek cooperation from the private sector, what is your assessment on sustainability of the cooperation given diverse expectation of profits among private hospitals?	√
Design of supportive systems for the policy implementation	หน่วยงานของท่านต้องมีการดำเนินการอะไรบ้าง เพื่อให้นโยบายนี้เกิดขึ้นจริง (การเตรียมคน ระบบ IT งบประมาณ การแก้กฏหมาย หลักเกณฑ์ในการกำกับติดตาม วางแนวทางปฏิบัติในการจัดบริการ ดูแลพัฒนาคุณภาพบริการ วิธีการจ่ายการโอนเงิน การหาข้อยุติสำหรับประเด็นการขัดแย้ง)	What has your agency done to prepare for this policy? (manpower, IT systems, budgeting, legal amendment, follow-up measures, service guidelines, service quality management, fund transfer procedures, conflict resolution)	√	√		√
	หน่วยงานของท่านได้รับการสนับสนุนในการดำเนินงานตามนโยบายดังกล่าวอะไรบ้าง	Has your agency received any support to carry out the policy? How so?		√		√
Coherence of the policy to existing legal frameworks of each schemes and other public agencies.	การดำเนินงานตามนโยบายนี้ มีความสอดคล้อง / ขัดแย้งกับกฏระเบียบของหน่วยงานของท่าน หรือไม่ อย่างไร	Is this policy in agreement or conflict with the regulations governing your agency? How so?	√	√		√
	หากขัดแย้ง หน่วยงานของท่านทำอย่างไร (เป็นการแก้ไขแบบชั่วคราวหรือถาวร , ถ้าจะต้องแก้ไขแบบถาวร หน่วยงานท่านจะต้องดำเนินการอย่างไร)	Under regulatory conflict, how would you resolve the situation? (Is the resolution temporary or permanent? If permanent, how would you go about resolving it?)	√	√		√
	ถ้าเลือกได้โดยอิสระ กองทุนของท่านจะสนองนโยบายนี้อย่างไร	Given the authority to respond freely, how would you choose to respond to this policy?	√	√		√
	ในความเป็นจริงซึ่งไม่มีทางเลือก ท่านห่วงใยประเด็นอะไรมากที่สุด (clearing house, hidden agenda:all system harmonization,etc)	What are your greatest concerns? (Clearing house, hidden agenda, system harmonization, etc.)	√	√		√
	นโยบายดังกล่าว เอื้อต่อการเข้าถึงบริการฉุกเฉินแก่ผู้มีสิทธิภายใต้ระบบประกันสุขภาพที่ตนดูแลอยุ่ได้ดีเพิ่มขึ้นมากน้อยเท่าใด	How does this policy accommodate the access to EMS for the beneficiaries?		√		√
1.4 Clearing House process	ทำไมจึงเลือก สปสช. เป็นกลไกกลางในการเบิกจ่ายเงิน? มีเบื้องหลังแนวคิดอย่างไร? (เน้นถามการเมืองเป็นหลัก)	Why was NHSO chosen as a clearing house? (Do you think of any hidden agenda for this?)	√			√
	ท่านมีความคิดเห็นต่อกลไกกลางในการจ่ายเงินนี้อย่างไร (ที่ให้สปสช.เป็น Clearing House ) (เห็นด้วย ไม่เห็นด้วย) อะไรเป็นจุดอ่อน จุดแข็งของกลไกกลางแบบนี้	What is your opinion about assigning NHSO as clearing house mechanism? What are the advantages/disadvantages of a clearing house?)	√	√		√
	รูปแบบของกลไกกลางที่ท่านคิดว่า จะช่วยในการดำเนินงานนโยบายให้บรรลุวัตถุประสงค์ควรจะมีลักษณะอย่างไร	In your opinion, what kind of format of a clearing house best suited to carry out this policy successfully?	√	√		√
	ท่านคิดว่าการมีกลไกลกลางในการตามจ่ายที่ออกแบบในปัจจุบัน (สปสช.ทำหน้าที่เป็นกลไกกลาง) เอื้อต่อการเข้าถึงบริการแก่ผู้ป่วยฉุกเฉินได้ดีมากน้อยเพียงใด	Do you think that the proposed clearing house design (NHSO as a clearing house) helps facilitate the access to EMS for the beneficiaries?	√	√		√
		From Policy to Implementation
2.1 Policy Implementation	หน่วยงานท่านมีบทบาท / ส่วนร่วมในการดำเนินงานตามนโยบายนี้อย่างไร (หน่วยงานหลัก รอง คือใคร)	What role does your agency play or participate in this policy? (Which agency takes on the primary or secondary role?)	√	√		√
	มาตรการ/วิธีการใดที่หน่วยงานของท่านนำมาใช้ เพื่อให้สามารถดำเนินงานตามนโยบายได้	What measures does your agency employ to implement this policy?	√	√	√	√
	กลไกหลักในการประสานการดำเนินงานตามนโยบายคืออะไร	What is the key mechanism to coordinate the implementation of this policy?	√		√	√
	ที่ผ่านมา ท่านมีความห่วงใยในเรื่องใดเกี่ยวกับการปฏิบัติตามนโยบายนี้	What are your concerns on the implementation of this policy thus far?	√		√	√
	ท่านคิดว่าหน่วยงานท่านสามารถนำนโยบายไปปฏิบัติได้มากน้อยอย่างไร	How effectively do you think your agency can take this policy into practice?		√	√	√
	หน่วยงานท่านต้องมีการปรับเปลี่ยนเครือข่ายหน่วยบริการในการสั่งการนำส่งผู้ป่วยของหน่วยกู้ชีพในพื้นที่หรือไม่อย่างไร (หน่วยกู้ชีพต้องมีการปรับเปลี่ยนการนำส่งสถานพยาบาลที่อยู่ใกล้อย่างไรอันเนื่องจากนโยบายดังกล่าว)	Does your agency have to rearrange the service network to work with local rescue units in your area? (How are rescue units affected from this policy in delivering the patients to the hospital?)		√	√
	ท่านได้รับการสนับสนุน ติดตามการดำเนินงานจากหน่วยงานใดหรือไม่ อย่างไร มีประโยชน์หรือไม่	Have you ever received contact or support from any agency? If so, was it helpful?		√	√
2.2 Perception	ท่านรับรู้นโยบายนี้จากช่องทางใด มีความชัดเจนจนสามารถนำไปปฏิบัติได้มากน้อยเพียงใด	How did you hear about this policy? Are its contents sufficiently clear and practical to implement?		√	√
2.3 Barriers	ปัญหาอุปสรรคหลักในการดำเนินงานตามนโยบายนี้คืออะไร (ยกตัวอย่าง) และมีการดำเนินการแก้ไขอย่างไร	What are the major roadblocks for this policy? (Give examples) And how do you plan to overcome them?	√	√	√	√
	เวลาประสบปัญหา กลไกหลักในการให้คำปรึกษาในการแก้ไขคืออะไร	What is the main approach in solving the problem when it occurs?		√	√	√
2.4 Recommendations	ท่านคิดว่าควรมีการปรับหรือแก้ไขประเด็นใดบ้าง เพื่อที่จะทำให้นโยบายบรรลุประเด็นการสัมภาษณ์ระดับปฏิบัติวัตถุประสงค์	What changes do you think are needed in certain areas in order to make this policy a successful as possible?	√		√	√
Private hospital compensation
	แนวคิดหลักในการจัดบริการและจ่ายชดเชยค่าบริการแก่โรงพยาบาลคืออะไร	What is the motivation behind the proposed service and compensation payment to the hospital?		√	√
	มาตรการ/ เหตุผลและแรงจูงใจที่ทำให้โรงพยาบาลเอกชนให้ความร่วมมือในการจัดบริการภายใต้นโยบายดังกล่าวคืออะไร	What are the measures, reasons, and motives for private hospitals to participate in this program?		√	√
	อัตราค่าบริการที่จ่ายในปัจจุบันได้มาอย่างไร	How did you come up with the current service rate?		√
	อัตราการจ่ายในปัจจุบันมีความเหมาะสมเพียงใด และคาดว่าจะมีผลกระทบอย่างไรต่อการให้ความร่วมมือในการจัดบริการและความยั่งยืนของโครงการในระยะยาวหรือไม่	Is the current rate reasonable? Do you think it will have an impact on the policy’s buy-in and its long-term sustainability?		√	√
	มีการเรียกเก็บและจ่ายระหว่างกองทุนแล้วหรือไม่ ขนาดเท่าใด มีผลกระทบต่อกองทนและปัญหาอุปสรรคอะไรบ้าง	Has any collection or inter-fund payment already taken place? If so, what’s the size of the payment? Does it have any impact on the fund? Are there any problems?		√	√
	อัตราการจ่ายที่เหมาะสมควรเป็นอย่างไร/การชดเชยค่าบริการแก่โรงพยาบาลเอกชนที่ให้ความร่วมมือในการจัดบริการควรมีลักษณะอย่างไร	What’s the appropriate rate? What’s the proper compensation scheme for private hospitals that take part in this program?		√	√
	ท่านคิดว่าแนวคิดที่กำหนดให้โรงพยาบาลเอกชนต้องให้ความร่วมมือและคืนประโยชน์แก่สังคมบ้างเป็นสิ่งที่ยอมรับได้หรือไม่	Do you think that the idea of encouraging private hospitals to participate and give back to society acceptable?	√		√
	ผู้ป่วยฉุกเฉินระดับวิกฤต (สีแดง) หรือฉุกเฉิน (สีเหลือง) เบิกผ่านโครงการดังกล่าวทุกรายหรือไม่ หากไม่ทางโรงพยาบาลมีวิธีการจัดการอย่างไร เช่น กรณีอุบัติเหตุทางรถ (พรบ.ผู้ประสบภัยจากรถ) อุบัติเหตุจากการทำงาน (กองทุนทดแทน) กรณีมีประกันเอกชน......เป็นต้น ทั้งนี้สัดส่วนผู้ป่วยฉุกเฉินระดับวิกฤตที่เบิกภายใต้นโยบายดังกล่าวมีประมาณร้อยละเท่าใด	Do all serivices for patients with critical (red) or urgent (yellow) conditions get reimbursed through the program? If not, how does the hospital handle it? Cases in point, reimbursment under the Road Accident Victim Compensation Act), Workmen's compensation fund or private insurance policy, etc. What is the percentage of patients with critical conditions got reimbursed through this program?			√
	อัตราการจ่ายภายใต้นโยบายดังกล่าวในปัจจุบัน โรงพยาบาลสามารถ absorb ในช่วง critical period ได้หรือไม่ และยอมรับได้ขนาดไหนสำหรับโรงพยาบาลของท่าน	Under the current payment scheme, does the hospital have the ability to absorb the financial burden during provision of care for cases in a critical period? How acceptable is it for your hospital to do so?			√
	โรงพยาบาลท่านมีการปรับตัวอย่างไรเพื่อรองรับนโยบายดังกล่าว	How has your hospital adapted to cope with this policy?			√
		Acceptance from healthcare providers
Policy perception in hospitals	ท่านรับรู้นโยบายนี้จากช่องทางใด มีความชัดเจนจนสามารถนำไปปฏิบัติได้มากน้อยเพียงใด	How did you hear about this policy? Is it sufficiently practical to implement?			√	√
	โรงพยาบาลมีความเข้าใจและมีความคิดเห็นต่อเป้าประสงค์ของนโยบายนี้อย่างไร	What is your opinion on the objectives of this policy?			√	√
	โรงพยาบาลมีการสื่อสารให้กับผู้ปฏิบัติงานในโรงพยาบาลทราบถึงนโยบายนี้หรือไม่ ถ้ามีใช้ช่องทางใดในการสื่อสาร	Has the hospital communicated this policy to your employees? If so, through which channels?			√	√
Medical services in hospitals	โรงพยาบาลมีแนวปฏิบัติในการให้บริการกับผู้ป่วยฉุกเฉินหรืออุบัติเหตุที่ไม่ผ่านระบบ 1669 หรือไม่ อย่างไร	Does the hospital have a policy in place to service emergency patients without going through the 1669 (EMS) hotline system? How so?			√	√
	กรณีที่ผู้ป่วยเข้ามารับการรักษาที่รพ.ของท่านโดยไม่ผ่านระบบ 1669 ใครจะเป็นผู้ตัดสินใจ	Who has the authority to decide how to handle patients who do not come via 1669 hotline system?			√	√
	โรงพยาบาลมีแนวปฏิบัติในการส่งตัวผู้ป่วยฉุกเฉินหรืออุบัติเหตุเมื่อพ้นภาวะวิกฤติ จนอยู่ในสภาวะที่สามารถส่งต่อไปรับการรักษาต่อที่รพ.อื่นๆหรือไม่ อย่างไร	Does the hospital have a policy to transfer emergency patients who are no longer in critical conditions to another hospital? How so?			√	√
	โรงพยาบาลมีการรับตัวผู้ป่วยฉุกเฉินหรืออุบัติเหตุไว้รักษาตัวจนทุเลาและจำหน่ายกลับบ้านหรือไม่ ถ้ามี ทำไมถึงรับไว้รักษาตัวจนทุเลา อะไรคือเหตุผลที่รับไว้ ค่าใช้จ่ายที่เกิดขึ้นเบิกจ่ายอย่างไร	Does the hospital have a policy to admit emergency patients and discharge them upon recovery? If so, what are the criteria for admission and treatment? Who is responsible for the incurred medical expenses?			√	√
	โรงพยาบาลของท่านมีการแจ้ง / ประกาศให้ประชาชนทั่วไปรับรู้ว่าสามารถเข้ามารับบริการที่รพ.ในกรณีฉุกเฉินได้ หรือไม่ อย่างไร	Does your hospital notify the public regarding your policy to admit emergency patients? How so?			√	√
Barriers	1. นโยบายดังกล่าวมีผลกระทบต่อการให้บริการของโรงพยาบาลหรือไม่ อย่างไร	1. Does such policy have an impact on your service? How so?			√
	2. ท่านคิดว่า อะไรคือสาเหตุที่ทำให้ผู้ป่วยฉุกเฉินหรืออุบัติเหตุที่ไม่ผ่านระบบ 1669	2. What do you think are the causes of emergency patients bypassing 1669 hotline system?			√
	3. ปัญหาที่พบจากการดำเนินการตามนโยบายนี้ เช่น การรับผู้ป่วย การส่งต่อ การเบิกจ่ายเงิน มีหรือไม่ ท่านแก้ไขอย่างไร	3. Have you encountered any problems with regard to the admission, transfer, and payment? If so, how did you resolve them?			√
Complaints	ท่านคิดว่า สาเหตุที่รพ.ของท่านถูกร้องเรียนเกิดจากอะไร	Why do you think your hospital receive complaints?			√	√
	กระบวนการที่เกิดขึ้นหลังจากถูกร้องเรียน มีการดำเนินการอย่างไร (ใครเข้ามาตรวจสอบ มีการชี้แจงข้อเท็จจริงอย่างไร ได้รับการพิจารณาอย่างไร)	What is the procedure to handle complaints after they are appealed? (Who does the fact-finding, clarification, and judgement?)			√	√
		Access to exercise rights and effects on service quality
process of care	รพ.ปฏิบัติต่อคนไข้ฉุกเฉินทั้ง 3 สิทธิแตกต่างกันหรือไม่อย่างไร และแตกต่างจากคนไข้ที่จ่ายเองหรือไม่ หากมองในแง่ process of care (Access,Triage ,Initial assessment and Life-saving intervention, Investigation ที่จำเป็น ,Disposition, Transportation, Finance	Does your hospital treat patients who use the benefits differently from the patients who pay by themselves? In the aspects of process of care, (Access,Triage ,Initial assessment and Life-saving intervention, Necessary Investigation ,Disposition, Transportation, Finance			√
Patient's access to care	ส่วนใหญ่เป็น walk-in หรือมาจากระบบการแพทย์ฉุกเฉินหรือระบบอื่นๆ	Do the majority of patients are walk-in or do they come from other emergency channels?			√
	สัดส่วนเปลี่ยนแปลงจากเดิมหรือไม่อย่างไร	Has the proportion changed?			√
	จำนวนผู้ป่วยที่มาเพื่อขอใช้สิทธินี้เพิ่มมากขึ้นจากเดิมหรือไม่	Does the number of beneficiaries grow compared to the past?			√
	ส่วนใหญ่เป็นการมาอย่างสมเหตุสมผลหรือไม่ เช่นใกล้จุดเกิดเหตุ	Are the visits reasonable? For instance, the accidents happen nearby, etc.			√
	ถ้าเป็นการมาอย่างไม่สมเหตุสมผลส่วนใหญ่เกิดจากอะไร	If the visits are not reasonable, why do patients choose your hospital?			√
Screening of patients	การยอมรับของผู้ป่วยที่ไม่เข้า Criteria ฉุกเฉิน	The admission of patients who do not fall into the emergency screening criteria			√
	ปัญหาที่พบ การร้องเรียนที่พบ และมีผลต่อการตัดสินใจ over triage, under triage หรือไม่หรือไม่เปลี่ยนแปลงจากเดิม	What types of problem have you encountered? What are the complaints? Does it affect your decisions?			√
Patient's access to insurance schemes	ขั้นตอนที่ผู้ป่วยต้องปฏิบัติเพื่อให้เข้าถึงสิทธิทั้งในกรณีที่เป็นโรงพยาบาลในเครือข่ายและนอกเครือข่าย	What are the procedures that the patients have to follow in the cases of participating hospitals and non-participating ones?			√
	ปัญหาที่พบในกระบวนการดำเนินการอนุมัติสิทธิทั้งจาก 3 กองทุนและจาก Clearing house	What are some of the problems found in the approval process from the three schemes and the clearing house?			√
Primary treatment and evaluation	ควรมี Criteria ระบุให้ชัดเจนหรือไม่ว่าควรมีอะไรบ้าง และขอบเขตควรเป็นอย่างไร	Should there be clear criteria? What should be the scope?			√
	คุณภาพและมาตรฐานของการรักษาที่เหมาะสมในการดูแลรักษาเบื้องต้นภายใต้ นโยบายนี้ยังมีข้อจำกัดอะไรบ้าง	What are the limitations under this policy for the quality and standard of first aid treatment?			√
	มี workload เพิ่มขึ้นหรือไม่ มี ER crowding เพิ่มขึ้นหรือไม่ ทำให้มีผลต่อคุณภาพการตรวจรักษาและให้บริการที่เปลี่ยนไปอย่างไรบ้าง	Does the workload increase? Does ER crowding increase to the point where it affects the quality of treatment and service?			√
Proper further investigation	ปัญหาที่พบจากการส่งตรวจเพิ่มเติมที่จำเป็นบางอย่าง เช่น การส่ง Iron study ก่อนให้เลือด การส่ง CTA เพื่อ R/O aortic dissection แต่ผลออกมา negative สามารถเบิกจ่ายได้จริงหรือไม่	What are some of the problems found with regard to necessary extra tests such as the submission of iron study before blood test, the delivery of CTA for R/O aortic dissection but the result turns out to be negative? Can that be reimbursed?			√
	ควรมีกำหนดให้ชัดเจนหรือไม่ อย่างไร	Should there be a clear guideline? How so?			√
Referal system	Critical period แตกต่างกันอย่างไรในแต่ละสิทธิ เปลี่ยนแปลงจากเดิมหรือไม่ อย่างไร	How does critical period differ from one service to another? Is it different from the original? How so?			√
Financial reimbursement	ปัญหาการเบิกจ่ายเมื่อมีการให้สิทธิฉุกเฉินกรณีที่เป็นโรงพยาบาลในเครือข่ายของทั้ง 3 กองทุนเป็นอย่างไร เบิกจ่ายได้จริงตามจำนวนหรือไม่ และแตกต่างจากเดิมหรือไม่อย่างไร	What are the reimbursement problems found for emergency admission of participating hospitals from the three fund services? Can it be reimbursed according to actual expenses? How is it different from the original?			√
	ปัญหาการเบิกจ่ายกรณีที่เป็นโรงพยาบาลนอกเครือข่าย 3 กองทุน	What are the problems found for emergency admission of non-participating hospitals?			√
	การเบิกจ่ายโดยใช้ clearing house มีปัญหาอะไรที่เกิดขึ้นบ้าง เบิกจ่ายได้จริงตามจำนวน ความตรงต่อเวลา	What are the problems found when the reimbursement takes place from a clearing house? Can it be reimbursed according to actual expenses incurred? How timely is the payment?			√
	การเบิกจ่ายโดยใช้ 10,500 x RW ของ DRG มีความเหมาะสม หรือไม่ มีผลต่อการตัดสินใจในการรักษาหรือไม่	Is the payment using 10,500 x RW of DRG appropriate? Does it affect the treatment decision?			√
